# Supplementary material
Source: PubMed Central journal article supplement (PMC7199465)
Supplement: NIHMS1576458-supplement-Supplementary_Information.pdf [file NIHMS1576458-supplement-Supplementary_Information.pdf]

In the format provided by the authors and unedited.

# Entry of glucose- and glutamine-derived carbons into the citric acid cycle supports early steps of HIV-1 infection in CD4 T cells

Isabelle Clerc<sup>1,6</sup>, Daouda Abba Moussa<sup>1,6</sup>, Zoi Vahlas<sup>1,6</sup>, Saverio Tardito <sup>2,3</sup>, Leal Oburoglu<sup>1</sup>, Thomas J. Hope<sup>4</sup>, Marc Sitbon <sup>1</sup>, Valérie Dardalhon<sup>1</sup>, Cédric Mongellaz <sup>1,7\*</sup> and Naomi Taylor <sup>1,5,7\*</sup>

---

<sup>1</sup>Institut de Génétique Moléculaire de Montpellier, University of Montpellier, CNRS, Montpellier, France. <sup>2</sup>Cancer Research UK, Beatson Institute, Glasgow, UK. <sup>3</sup>Institute of Cancer Sciences, University of Glasgow, Glasgow, UK. <sup>4</sup>Department of Cell and Molecular Biology, Northwestern University Feinberg School of Medicine, Chicago, IL, USA. <sup>5</sup>Present address: Pediatric Oncology Branch, National Cancer Institute, National Institutes of Health, Bethesda, MD, USA. <sup>6</sup>These authors contributed equally: Isabelle Clerc, Daouda Abba Moussa, Zoi Vahlas. <sup>7</sup>These authors jointly supervised this work: Cédric Mongellaz, Naomi Taylor. \*e-mail: [mongellaz@igmm.cnrs.fr](mailto:mongellaz@igmm.cnrs.fr); [taylor@igmm.cnrs.fr](mailto:taylor@igmm.cnrs.fr)

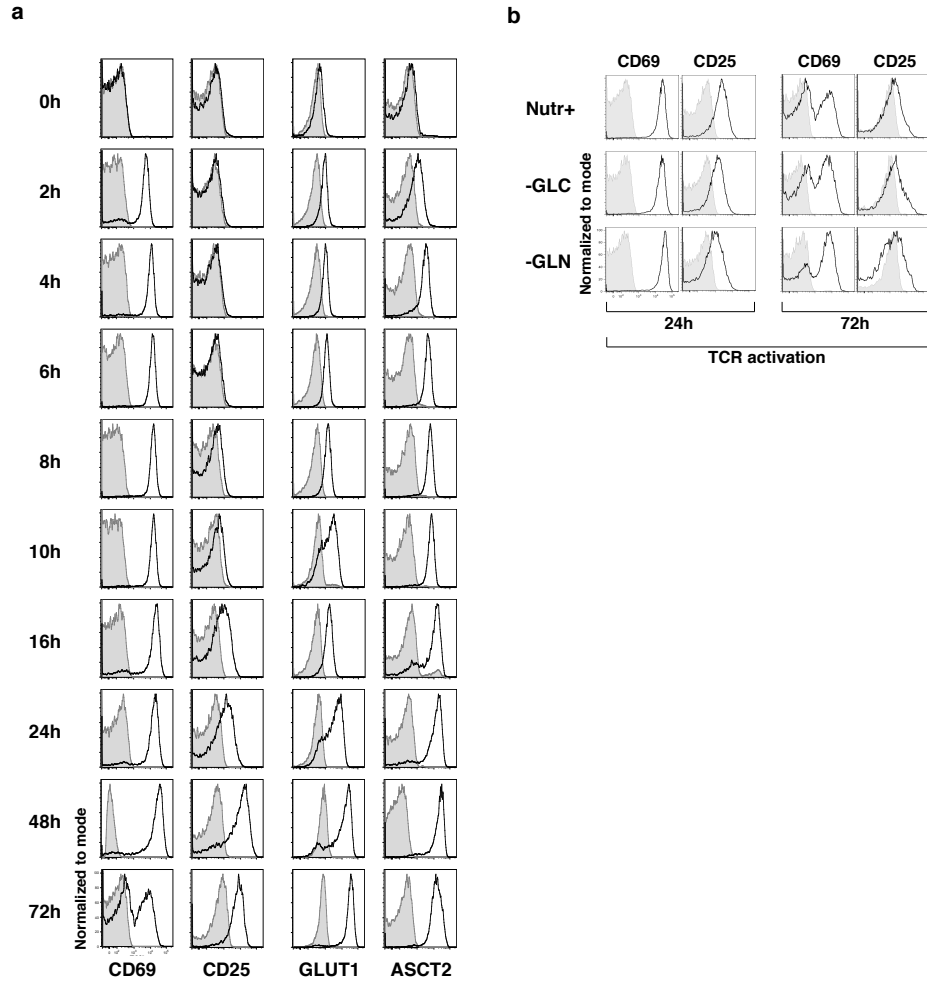

**Supplementary Figure 1. GLUT1 and ASCT2 nutrient transporters are rapidly upregulated following TCR stimulation.** (a) Human CD4 T cells were stimulated with  $\alpha$ CD3/ $\alpha$ CD28 mAbs and surface expression of early activation markers (CD25 and CD69) as well as the GLUT1 glucose and ASCT2 glutamine transporters were monitored at 2, 4, 6, 8, 10, 18, 24, 48 and 72 hours post stimulation. Representative histograms are presented. Control immunofluorescence is shown in grey histograms and specific staining is shown in black line histograms (representative of n=2 biologically independent samples). (b) Expression of CD25 and CD69 activation markers were assessed at 24 and 72h post activation in nutrient-replete conditions (Nutr+) as well as following deprivation of glucose (-GLC) or glutamine (-GLN) at 19h (representative of n=4 biologically independent samples).



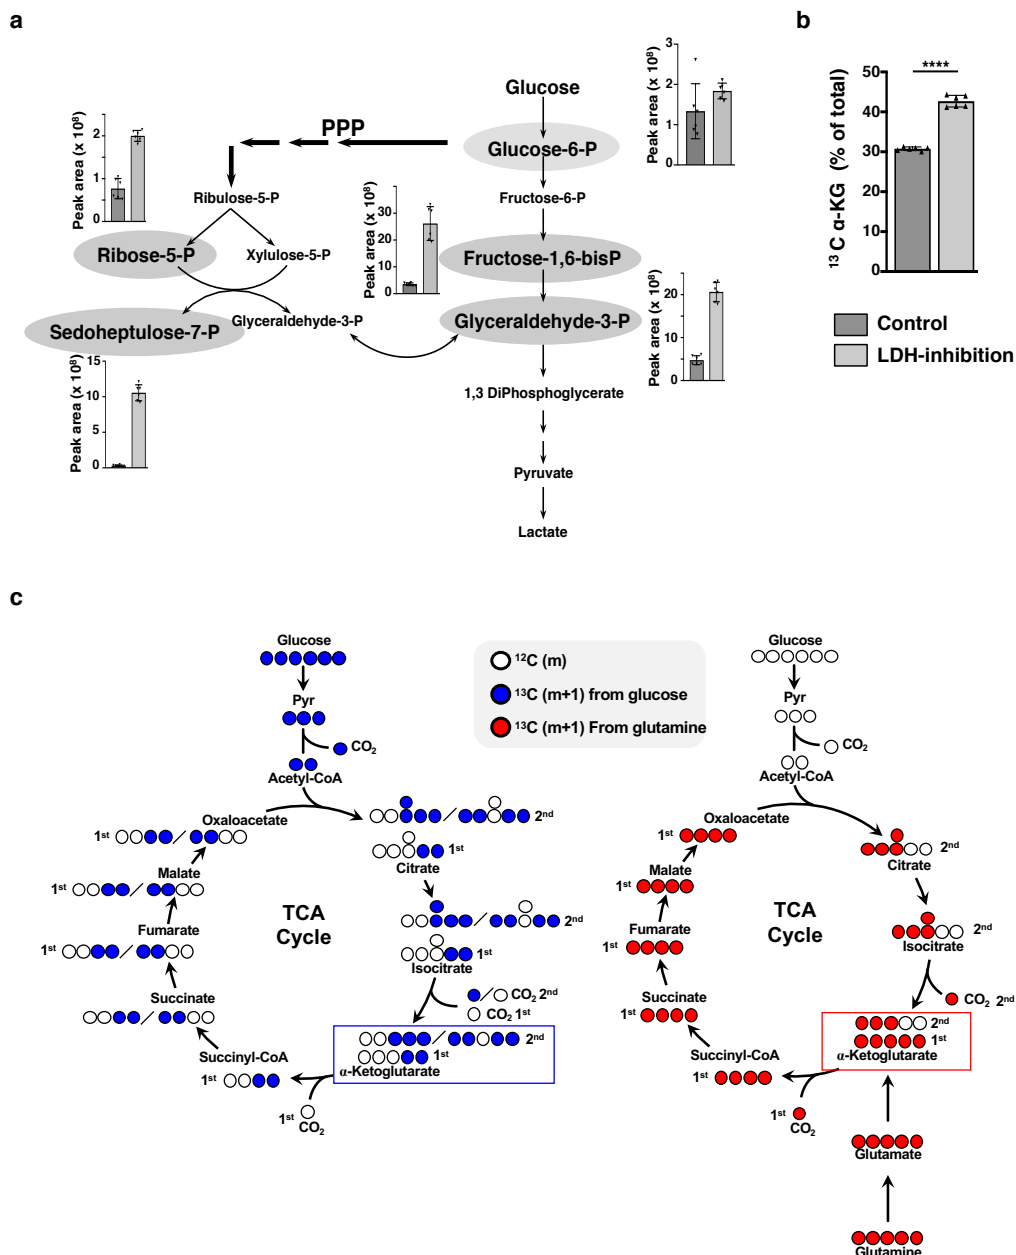

**Supplementary Figure 3.  $^{13}\text{C}$  metabolic flux analyses from  $[\text{U-}^{13}\text{C}_6]$ glucose and  $[\text{U-}^{13}\text{C}_5]$ glutamine into pentose phosphate pathway and TCA cycle intermediates. (a) The presence of pentose phosphate pathway intermediates following TCR stimulation of CD4 T cells under control conditions or following LDH inhibition (LDHi) with the competitive pyruvate analogue oxamate was monitored by HPLC-MS (mean  $\pm$ SEM,  $n=2$  biologically independent samples performed in technical triplicates). (b) The percentage of  $\alpha$ -KG derived from  $^{13}\text{C}$  glucose carbons in T cells activated in the absence vs presence of oxamate was monitored by HPLC-MS (mean  $\pm$ SEM,  $n=2$  biologically independent samples performed in technical triplicates;  $p < 0.0001$ , unpaired t-test, 2-tailed). (c) A simplified representation of the distribution of  $^{13}\text{C}$  carbon atoms derived from glucose (blue dots) and glutamine (red dots) in TCA cycle intermediates. The isotopologues of  $\alpha$ -ketoglutarate derived from the 1<sup>st</sup> and 2<sup>nd</sup> rounds of the cycle are shown in boxes and isotopologues in other intermediates are indicated.**

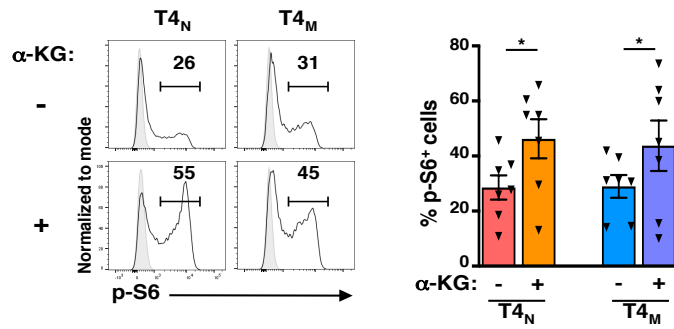

**Supplementary Figure 4. α-KG increases mTOR signaling in activated CD4 T cells under conditions of glutamine deprivation.** Naïve (T<sub>4N</sub>) and memory (T<sub>4M</sub>) CD4 T cells were TCR-stimulated in glutamine deprivation conditions in the absence or presence of cell permeable α-KG (dimethyl ketoglutarate, 3.5mM). S6 phosphorylation (p-S6) was monitored and representative plots are presented with isotype controls (grey histograms) and specific staining (black line, left). The mean percentages of p-S6<sup>+</sup> cells ± SEM are presented (right; n=7 biologically independent samples; 2-tailed t-test; \*, p=0.0119 for T<sub>4N</sub> and p=0.0466 for T<sub>4M</sub>. Precise p values are indicated in Supplementary Table 3.

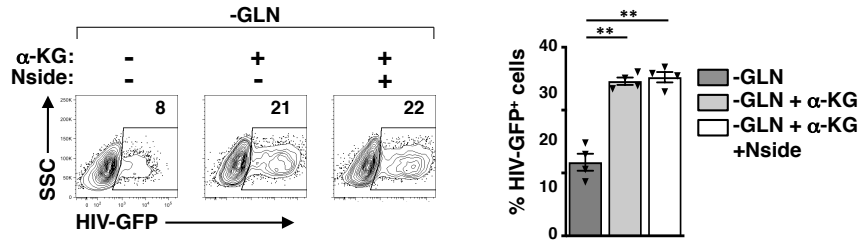

**Supplementary Figure 5. The impact of  $\alpha$ -KG on HIV-1 infection in glutamine-deprived CD4 T cells is not altered by exogenous nucleosides.** CD4 T cells activated in glutamine-deprived conditions were cultured in the absence or presence of  $\alpha$ -KG and exogenous nucleosides (Nside; 30  $\mu$ M). Cells were infected with single round HIV-1 virions and reporter expression was assessed 48h later. Representative histograms are shown (left panels) and quantification  $\pm$  SEM of HIV infection is presented (right; n=4 biologically independent samples; 2-tailed t-test). \*\*p=0.0041 for -GLN vs. -GLN+ $\alpha$ -KG and p=0.0016 for -GLN vs. -GLN+ $\alpha$ -KG+Nside.

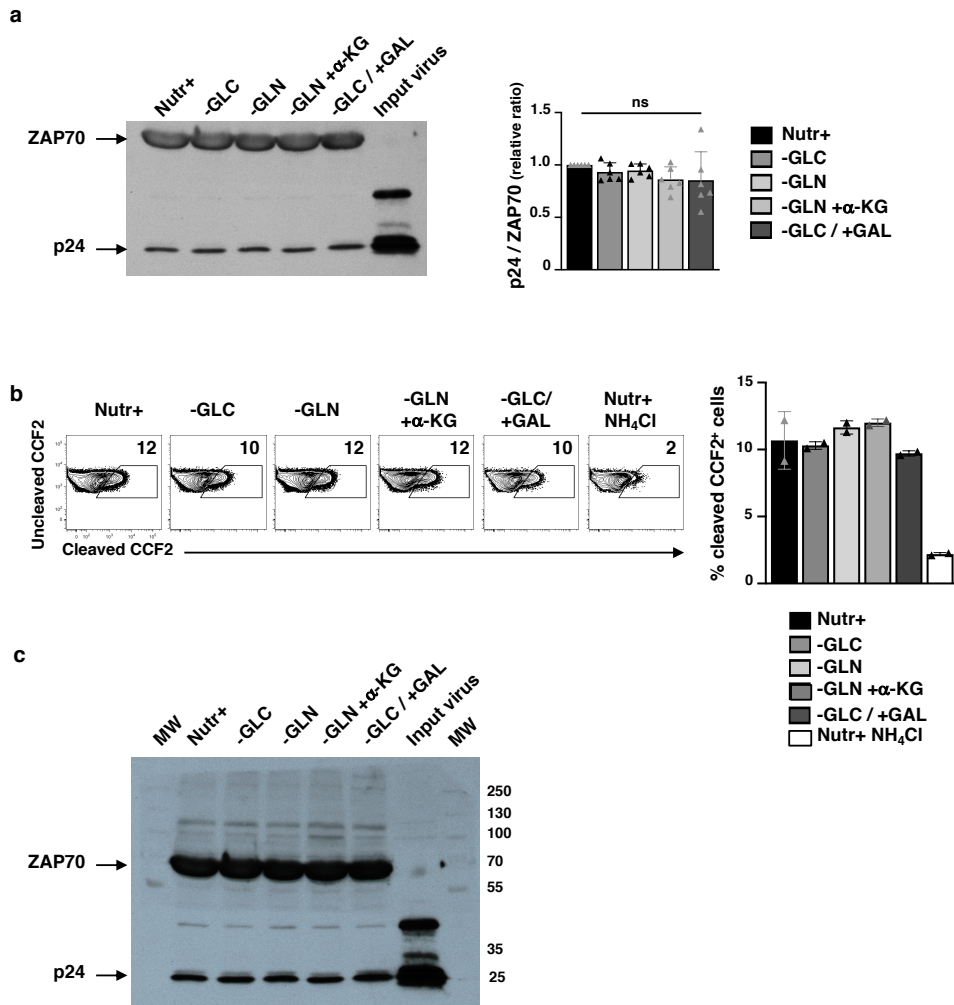

Supplementary Figure 6. **Fusion of HIV-1 virions to CD4 T cells is not modulated by nutrient conditions.** (a) Fusion was assessed as a function of cellular uptake of Gag p24. CD4 T cells were activated for 19h, transferred to the indicated nutrient conditions for 5h (24h post activation) and then exposed to virus particles for 2h at 37°C. Cell lysates were subject to immunoblot and probed with anti-p24 and anti-ZAP-70 mAbs. A representative blot is presented (left, of n=6 biologically independent samples) and the level of p24 input virus is shown. The level of p24 relative to ZAP-70 in control conditions (Nutr+) was arbitrarily set to 1 and ratios in the indicated positions are presented (n=6 biologically independent samples, 1-way ANOVA test; ns, non-significant p>0.05). (b) Fusion was assessed using virus containing β-lactamase (BlaM)-Vpr chimeric protein. CD4 T cells were activated as above prior to a 2h incubation with virions containing BlaM-Vpr at 37°C. Cells were then loaded with CCF2-AM to monitor fusion; cells harboring BlaM-Vpr exhibit blue fluorescence due to cleavage of CCF2. Incubation with ammonium chloride (NH<sub>4</sub>Cl) was used as a negative control, inhibiting fusion. Percent fusion is presented (n=2 independent experiments from n=1 biologically independent sample). (c) The uncropped western blot shown in panel a is presented with full molecular weight markers. Precise p values are presented in Supplementary Table 3.

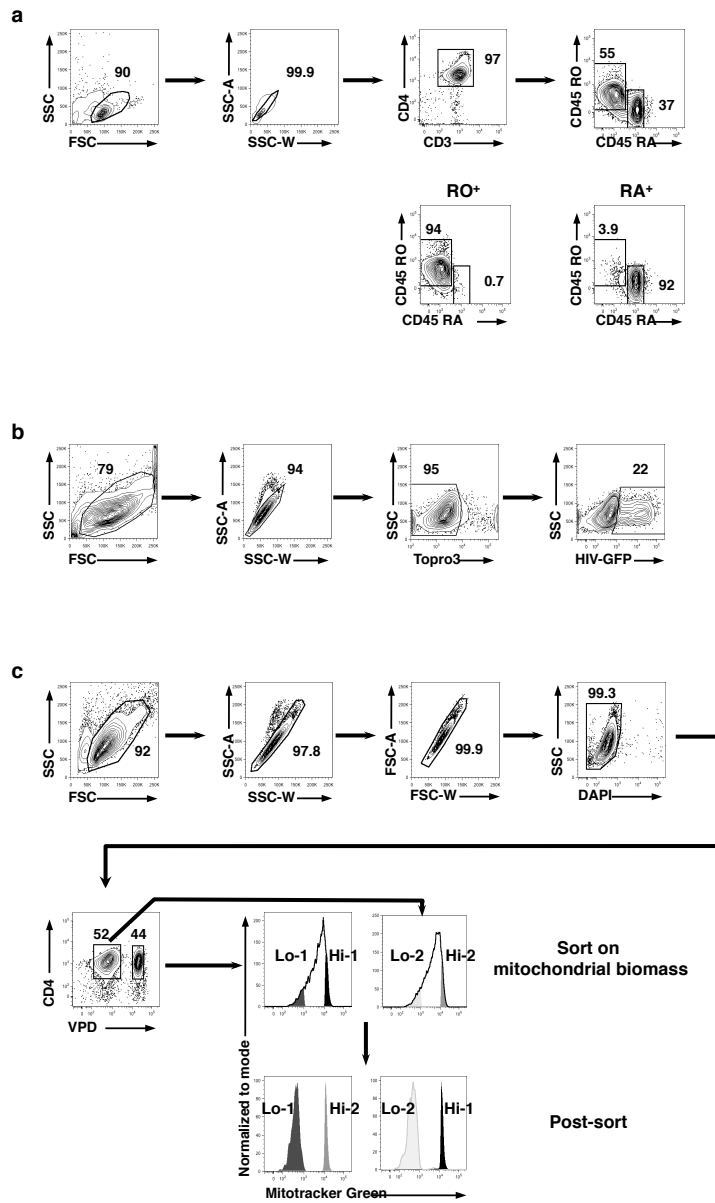

**Supplementary Figure 7. Gating strategy for flow cytometry analysis of CD4 T cells.** (a) Gating strategies showing FSC/SSC profiles, followed by FSC-A/SSC-W profiles for live freshly isolated CD4-selected T cells. For evaluation of naïve and memory CD4 T cells, CD45RA/CD45RO profiles are presented. (b) Representative gating strategies for TCR-stimulated CD4 T cells are presented showing sequential FSC/SSC, SSC-A/SSC-W and SSC/Topro3 profiles followed by HIV-GFP evaluation are presented. The percentages of cells in each gate are indicated. (c) Gating strategies for FACS-sorting of VDP-unlabeled and labeled CD4 T cells as a function of Mitotracker Green staining. Sequential FSC/SSC, SSC-A/SSC-W, FSC-A/FSC-W, and SSC/DAPI profiles are presented followed by sorting of CD4/VDP cells on the basis of Mitotracker Green profiles and evaluation of sorted cells.



### List of Antibodies/Reagents

| Protein                                     | Ref.       | Supplier                      |
|---------------------------------------------|------------|-------------------------------|
| $\alpha$ -CD3 purified (clone OKT3)         | 317302     | BioLegend                     |
| $\alpha$ -CD28 purified (clone 9.3)         |            | Dr. Carl June                 |
| $\alpha$ -hCD3-APC-AF750 (clone UCHT1)      | A66329     | Beckman Coulter               |
| $\alpha$ -hCD4-PE (clone 13B8.2)            | A07751     | Beckman Coulter               |
| $\alpha$ -hCD4-BV786 (clone SK3)            | 563881     | Becton Dickinson              |
| $\alpha$ -hCD45RA-FITC (clone ALB-11)       | A07786     | Beckman Coulter               |
| $\alpha$ -hCD45RO-PC7 (clone UCHL1)         | B13648     | Beckman Coulter               |
| $\alpha$ -hCD25-APC (clone B1.49.9)         | B09684     | Beckman Coulter               |
| $\alpha$ -hCD69-PC7 (clone TPI.55.3)        | A80710     | Beckman Coulter               |
| $\alpha$ -hCD8-purified (clone OKT8)        | BE0004-2   | BioXcell                      |
| $\alpha$ -hCD8-APCeF780 (clone RPA-T8)      | 47-0088    | eBiosciences                  |
| $\alpha$ -hCD45RA purified (clone 5H9)      | 556625     | Becton Dickinson              |
| $\alpha$ -hCD45RO purified (clone UCHL1)    | 555491     | Becton Dickinson              |
| $\alpha$ -P-RPS6 (Ser 235/236) (clone 91B2) | 2211       | Cell Signaling Technology     |
| $\alpha$ -ZAP70 (clone 2F3.2)               |            | Dr A. Weiss                   |
| $\alpha$ -HIV p24 (clone 183H125C)          | NIH3537    | NIH AIDS Reagent Program      |
| GLUT1 RBD-GFP                               | GLUT1_G100 | Metafora Biosystems           |
| ASCT2 RBD-rFc                               | ASCT2.RBD  | Metafora Biosystems           |
| MitoTracker Green                           | M7514      | Molecular Probes/ThermoFisher |
| MitoSox Red                                 | M36008     | Molecular Probes/ThermoFisher |
| Gene Blazer In Vivo Detection kit           | 12578134   | Molecular Probes/ThermoFisher |

**Supplementary Table 1. List of antibodies/ reagents.** Clones, references and suppliers are indicated.

| Sequence   | Primers                                                                 |
|------------|-------------------------------------------------------------------------|
| R/U5       | Fwd 5'-GGCTAACTAGGGAACCCACTG-3'<br>Rev 5'-CTGCTAGAGATTTTCCACACTGAC-3'   |
| LTR/Gag    | Fwd 5'-TGTGTGCCCGTCTGTTGTGT-3'<br>Rev 5'-GAGTCCTGCGTCGAGAGAGC-3'        |
| 2LTRc      | Fwd 5'-GCCTCAATAAAGCTTGCCTTG-3'<br>Rev 5'-TCCCAGGCTCAGATCTGGTCTAAC-3'   |
| $\beta$ 2m | Fwd 5'-TGCTGTCTCCATGTTTGATGTATCT-3'<br>Rev 5'-TCTCTGCTCCCCACCTCTAAGT-3' |

**Supplementary Table 2. List of Primers.**

Supplementary Table 3. **Statistical analyses of data presented in all figures.**

Figure 1

| Panel | test            | n |                                               |      | p value |
|-------|-----------------|---|-----------------------------------------------|------|---------|
| 1d    | 2-tailed t-test | 5 | T4 <sub>N</sub> vs T4 <sub>M</sub>            | **   | 0.0010  |
| 1f    | 2-tailed t-test | 5 | T4 <sub>N</sub> Nutr+ vs T4 <sub>N</sub> -GLC | *    | 0.0130  |
|       |                 |   | T4 <sub>N</sub> Nutr+ vs T4 <sub>N</sub> -GLN | ***  | 0.0003  |
|       |                 |   | T4 <sub>N</sub> -GLC vs T4 <sub>N</sub> -GLN  | ***  | 0.0004  |
|       |                 |   | T4 <sub>M</sub> Nutr+ vs T4 <sub>M</sub> -GLC | **   | 0.0011  |
|       |                 |   | T4 <sub>M</sub> Nutr+ vs T4 <sub>M</sub> -GLN | **** | <0.0001 |
|       |                 |   | T4 <sub>M</sub> -GLC vs T4 <sub>M</sub> -GLN  | ***  | 0.0002  |

Figure 2

| Panel | test            | n  |                                               |      | p value |
|-------|-----------------|----|-----------------------------------------------|------|---------|
| 2a    | 2-tailed t-test | 13 | T4 <sub>N</sub> Nutr+ vs T4 <sub>N</sub> -GLC | **** | <0.0001 |
|       |                 |    | T4 <sub>N</sub> Nutr+ vs T4 <sub>N</sub> -GLN | **** | <0.0001 |
|       |                 |    | T4 <sub>N</sub> -GLC vs T4 <sub>N</sub> -GLN  | **** | <0.0001 |
|       |                 |    | T4 <sub>M</sub> Nutr+ vs T4 <sub>M</sub> -GLC | **** | <0.0001 |
|       |                 |    | T4 <sub>M</sub> Nutr+ vs T4 <sub>M</sub> -GLN | **** | <0.0001 |
|       |                 |    | T4 <sub>M</sub> -GLC vs T4 <sub>M</sub> -GLN  |      |         |
| 2b    | 2-tailed t-test | 3  | Nutr+ vs Nutr NSide                           | ns   | 0.3802  |
|       |                 |    | -GLC vs -GLC NSide                            | ns   | 0.5681  |
|       |                 |    | -GLN vs -GLN NSide                            | **   | 0.0062  |
| 2c    | 2-tailed t-test | 4  | Nutr+ vs Nutr NSide                           | ns   | 0.1366  |
|       |                 |    | -GLC vs -GLC NSide                            | ns   | 0.6402  |
|       |                 |    | -GLN vs -GLN NSide                            | ns   | 0.2028  |

Figure 3

| Panel    | test            | n |                                               |      | p value |
|----------|-----------------|---|-----------------------------------------------|------|---------|
| 3a       | 2-tailed t-test | 8 | T4 <sub>N</sub> Nutr+ vs T4 <sub>N</sub> -GLC | *    | 0.0142  |
|          |                 |   | T4 <sub>N</sub> Nutr+ vs T4 <sub>N</sub> -GLN | **** | <0.0001 |
|          |                 |   | T4 <sub>N</sub> -GLC vs T4 <sub>N</sub> -GLN  | **** | <0.0001 |
|          |                 |   | T4 <sub>M</sub> Nutr+ vs T4 <sub>M</sub> -GLC | ns   | 0.1337  |
|          |                 |   | T4 <sub>M</sub> Nutr+ vs T4 <sub>M</sub> -GLN | **** | <0.0001 |
|          |                 |   | T4 <sub>M</sub> -GLC vs T4 <sub>M</sub> -GLN  | **** | <0.0001 |
| 3b GLUT1 | 2-tailed t-test | 7 | T4 <sub>N</sub> Nutr+ vs T4 <sub>N</sub> -GLC | **   | 0.0011  |
|          |                 |   | T4 <sub>N</sub> Nutr+ vs T4 <sub>N</sub> -GLN | **   | 0.0022  |
|          |                 |   | T4 <sub>N</sub> -GLC vs T4 <sub>N</sub> -GLN  | ***  | 0.0004  |
|          |                 |   | T4 <sub>M</sub> Nutr+ vs T4 <sub>M</sub> -GLC | ns   | 0.1857  |
|          |                 |   | T4 <sub>M</sub> Nutr+ vs T4 <sub>M</sub> -GLN | **** | <0.0001 |
|          |                 |   | T4 <sub>M</sub> -GLC vs T4 <sub>M</sub> -GLN  | ***  | 0.0002  |
| 3b ASCT2 | 2-tailed t-test | 7 | T4 <sub>N</sub> Nutr+ vs T4 <sub>N</sub> -GLC | ***  | 0.0008  |
|          |                 |   | T4 <sub>N</sub> Nutr+ vs T4 <sub>N</sub> -GLN | **   | 0.0043  |
|          |                 |   | T4 <sub>N</sub> -GLC vs T4 <sub>N</sub> -GLN  | **   | 0.0060  |
|          |                 |   | T4 <sub>M</sub> Nutr+ vs T4 <sub>M</sub> -GLC | ns   | 0.1027  |
|          |                 |   | T4 <sub>M</sub> Nutr+ vs T4 <sub>M</sub> -GLN | ns   | 0.3138  |
|          |                 |   | T4 <sub>M</sub> -GLC vs T4 <sub>M</sub> -GLN  | ns   | 0.1971  |

|         |                 |   |               |      |         |
|---------|-----------------|---|---------------|------|---------|
| 3c OCR  | 2-tailed t-test | 5 | NS vs Nutr+   | *    | 0.0125  |
|         |                 | 4 | NS vs -GLC    | *    | 0.0257  |
|         |                 | 4 | NS vs -GLN    | *    | 0.0469  |
|         |                 | 8 | Nutr+ vs -GLC | *    | 0.0100  |
|         |                 | 8 | Nutr+ vs -GLN | **   | 0.0067  |
|         |                 | 8 | -GLC vs -GLN  | **   | 0.0026  |
| 3c ECAR | 2-tailed t-test | 6 | NS vs Nutr+   | **   | 0.0051  |
|         |                 | 5 | NS vs -GLC    | *    | 0.0351  |
|         |                 | 5 | NS vs -GLN    | **   | 0.0048  |
|         |                 | 9 | Nutr+ vs -GLC | **   | 0.0038  |
|         |                 | 9 | Nutr+ vs -GLN | *    | 0.0332  |
|         |                 | 9 | -GLC vs -GLN  | **** | <0.0001 |
| 3d      | 2-tailed t-test | 6 | NS vs Nutr+   | *    | 0.0243  |
|         |                 | 5 | NS vs -GLC    | *    | 0.0197  |
|         |                 | 5 | NS vs -GLN    | *    | 0.0104  |
|         |                 | 9 | Nutr+ vs -GLC | **** | <0.0001 |
|         |                 | 9 | Nutr+ vs -GLN | *    | 0.0106  |
|         |                 | 9 | -GLC vs -GLN  | **** | <0.0001 |

Figure 4

| Panel      | test                | n |                        |    | p value |
|------------|---------------------|---|------------------------|----|---------|
| 4c         | 2-tailed t-test     | 4 | TCR vs Oxamate         | ** | 0.0067  |
|            |                     | 4 | TCR vs GSKi            | *  | 0.0347  |
|            |                     | 4 | Oxamate vs GSKi        | ns | 0.6651  |
| 4d         | 1w ANOVA -<br>Tukey | 6 | TCR vs Oxamate         | ** | 0.0029  |
|            |                     |   | TCR vs Lactate         | *  | 0.0401  |
|            |                     |   | TCR vs TCR Pyr         | ns | 0.1378  |
|            |                     |   | Oxamate vs Oxamate Pyr | *  | 0.0149  |
|            |                     |   | Lactate vs Lactate Pyr | *  | 0.0197  |
| 4e RU5     | 2-tailed t-test     | 3 | T6 TCR vs Oxamate      | ns | 0.7864  |
|            |                     |   | T6 TCR vs Lactate      | ns | 0.4168  |
|            |                     |   | T24 TCR vs Oxamate     | ** | 0.0062  |
|            |                     |   | T24 TCR vs Lactate     | ns | 0.1200  |
| 4e LTR Gag | 2-tailed t-test     | 3 | T24 TCR vs Oxamate     | *  | 0.0454  |
|            |                     |   | T24 TCR vs Lactate     | *  | 0.0216  |
| 4e 2LTRc   | 2-tailed t-test     | 3 | T24 TCR vs Oxamate     | *  | 0.0251  |
|            |                     |   | T24 TCR vs Lactate     | *  | 0.0243  |

Figure 5

| Panel | test            | n |                                                  |     | p value |
|-------|-----------------|---|--------------------------------------------------|-----|---------|
| 5a    | 2-tailed t-test | 4 | -GLC no drug vs oligomycin                       | *** | 0.0008  |
|       |                 | 3 | -GLC no drug vs AntA                             | **  | 0.0089  |
|       |                 | 4 | -GLN no drug vs oligomycin                       | ns  | 0.5807  |
|       |                 | 3 | -GLN no drug vs AntA                             | ns  | 0.3965  |
| 5c    | 2-tailed t-test | 5 | T4 <sub>N</sub> -GLN vs T4 <sub>N</sub> -GLN aKG | **  | 0.0059  |
|       |                 |   | T4 <sub>M</sub> -GLN vs T4 <sub>M</sub> -GLN aKG | *   | 0.0135  |
|       |                 |   |                                                  |     |         |
|       |                 |   |                                                  |     |         |
|       |                 |   |                                                  |     |         |

|            |                 |   |                        |    |        |
|------------|-----------------|---|------------------------|----|--------|
| 5d RU5     | 2-tailed t-test | 6 | T6 Nutr+ vs -GLC       | ns | 0.6754 |
|            |                 |   | T6 Nutr+ vs -GLN       | ns | 0.4935 |
|            |                 |   | T6 Nutr+ vs -GLN DMK   | ns | 0.9338 |
|            |                 |   | T6 -GLN vs -GLN + aKG  | ns | 0.5999 |
|            |                 |   | T24 Nutr+ vs -GLC      | ** | 0.0081 |
|            |                 |   | T24 Nutr+ vs -GLN      | ** | 0.0022 |
|            |                 |   | T24 -GLN vs -GLN + aKG | ** | 0.0025 |
| 5d LTR Gag | 2-tailed t-test | 6 | T6 Nutr+ vs -GLC       | ns | 0.2768 |
|            |                 |   | T6 Nutr+ vs -GLN       | ns | 0.3478 |
|            |                 |   | T6 Nutr+ vs -GLN DMK   | ns | 0.4967 |
|            |                 |   | T6 -GLN vs -GLN + aKG  | ns | 0.7673 |
|            |                 |   | T24 Nutr+ vs -GLC      | ** | 0.0062 |
|            |                 |   | T24 Nutr+ vs -GLN      | ** | 0.0092 |
|            |                 |   | T24 -GLC vs -GLN       | *  | 0.0394 |
|            |                 |   | T24 -GLN vs -GLN + aKG | *  | 0.0130 |
| 5d 2LTRc   | 2-tailed t-test | 6 | T24 -GLN vs -GLN + aKG | *  | 0.0192 |

Figure 6

| Panel          | test            | n  |                                                      |      | p value |
|----------------|-----------------|----|------------------------------------------------------|------|---------|
| 6a<br>OCR/ECAR | 2-tailed t-test | 7  | T4 <sub>N</sub> -GLN vs T4 <sub>N</sub> -GLN inj aKG | ***  | 0.0003  |
|                |                 |    | T4 <sub>N</sub> -GLN vs T4 <sub>N</sub> -GLN aKG     | ***  | 0.0010  |
|                |                 |    | T4 <sub>M</sub> -GLN vs T4 <sub>M</sub> -GLN inj aKG | ***  | 0.0002  |
|                |                 |    | T4 <sub>M</sub> -GLN vs T4 <sub>M</sub> -GLN aKG     | ***  | 0.0002  |
| 6a ATP         | 2-tailed t-test | 7  | T4 <sub>N</sub> -GLN vs T4 <sub>N</sub> -GLN inj aKG | ***  | 0.0002  |
|                |                 |    | T4 <sub>N</sub> -GLN vs T4 <sub>N</sub> -GLN aKG     | **   | 0.0016  |
|                |                 |    | T4 <sub>M</sub> -GLN vs T4 <sub>M</sub> -GLN inj aKG | **** | <0.0001 |
|                |                 |    | T4 <sub>M</sub> -GLN vs T4 <sub>M</sub> -GLN aKG     | **   | 0.0013  |
| 6b<br>OCR/ECAR | 2-tailed t-test | 11 | TCR vs Oxamate                                       | **** | <0.0001 |
|                |                 |    | TCR vs Lactate                                       | **   | 0.0014  |
|                |                 |    | Oxamate vs Lactate                                   | **   | 0.0073  |
| 6b ATP         | 2-tailed t-test | 11 | TCR vs Oxamate                                       | **   | 0.0010  |
|                |                 |    | TCR vs Lactate                                       | **   | 0.0054  |
|                |                 |    | Oxamate vs Lactate                                   | ns   | 0.6066  |
| 6c             | 2-tailed t-test | 4  | TCR vs Oxamate                                       | *    | 0.0222  |
| 6d Mitogreen   | 2-tailed t-test | 18 | TCR neg vs TCR HIV                                   | **** | <0.0001 |
|                |                 |    | TCR neg vs Oxamate neg                               | **** | <0.0001 |
|                |                 |    | Oxamate neg vs Oxamate HIV                           | **** | <0.0001 |
|                |                 |    | TCR HIV vs Oxamate HIV                               | **** | <0.0001 |
| 6d Mitosox     | 2-tailed t-test | 15 | TCR neg vs TCR HIV                                   | ***  | 0.0008  |
|                |                 |    | TCR neg vs Oxamate neg                               | ***  | 0.0008  |
|                |                 |    | Oxamate neg vs Oxamate HIV                           | ***  | 0.0007  |
|                |                 |    | TCR HIV vs Oxamate HIV                               | ***  | 0.0005  |
| 6e             | 2-tailed t-test | 5  | TCR neg vs TCR HIV                                   | **** | <0.0001 |
|                |                 |    | Oxamate neg vs Oxamate HIV                           | **** | <0.0001 |

Figure 7

| Panel        | test            | n |                       |    | p value |
|--------------|-----------------|---|-----------------------|----|---------|
| 7a           | 2-tailed t-test | 4 | Mito Low vs Mito High | ** | 0.0015  |
| 7b infection | 2-tailed t-test | 6 | Mito Low vs Mito High | *  | 0.0450  |
| 7b MFI       | 2-tailed t-test | 6 | Mito Low vs Mito High | ** | 0.0016  |

Suppl Figure 2

| Panel             | test              | n  |                        |      | p value |
|-------------------|-------------------|----|------------------------|------|---------|
| S2a viability     | 1w-ANOVA<br>Tukey | 7  | T24 Nutr+ vs -GLC      | ns   | 0.9834  |
|                   |                   |    | T24 Nutr+ vs -GLN      | ns   | 0.9774  |
|                   |                   |    | T24 Nutr+ vs GAL       | ns   | 0.6811  |
|                   |                   |    | T48 Nutr+ vs -GLC      | ns   | 0.9930  |
|                   |                   |    | T48 Nutr+ vs -GLN      | ns   | 0.9727  |
|                   |                   |    | T48 Nutr+ vs GAL       | ns   | 0.7095  |
|                   |                   |    | T72 Nutr+ vs -GLC      | ns   | 0.6779  |
|                   |                   |    | T72 Nutr+ vs -GLN      | ns   | 0.5232  |
| S2a cell<br>count | 1w-ANOVA<br>Tukey | 5  | T72 Nutr+ vs GAL       | ns   | 0.8374  |
|                   |                   |    | T24 Nutr+ vs -GLC      | ns   | 0.7654  |
|                   |                   |    | T24 Nutr+ vs -GLN      | ns   | 0.5547  |
|                   |                   |    | T24 Nutr+ vs GAL       | ns   | 0.8741  |
|                   |                   |    | T48 Nutr+ vs -GLC      | ns   | 0.8657  |
|                   |                   |    | T48 Nutr+ vs -GLN      | ns   | 0.9986  |
|                   |                   |    | T48 Nutr+ vs GAL       | ns   | 0.9999  |
|                   |                   |    | T72 Nutr+ vs -GLC      | **** | <0.0001 |
|                   |                   |    | T72 Nutr+ vs -GLN      | **** | <0.0001 |
|                   |                   |    | T72 Nutr+ vs GAL       | **** | <0.0001 |
| S2b               | 2-tailed t-test   | 4  | T72 -GLC vs -GLN       | ns   | 0.0906  |
|                   |                   |    | T72 -GLC vs -GAL       | ns   | 0.7842  |
|                   |                   |    | T72 -GLN vs GAL        | *    | 0.0178  |
|                   |                   |    | Nutr+ vs -GLC          | **   | 0.0016  |
|                   |                   |    | Nutr+ vs -GLN          | **   | 0.0016  |
|                   |                   |    | Nutr+ vs GAL           | **   | 0.0049  |
| S2c               | 2-tailed t-test   | 4  | -GLC vs -GLN           | **   | 0.0088  |
|                   |                   |    | -GLC vs -GAL           | ns   | 0.2202  |
|                   |                   |    | -GLN vs -GAL           | *    | 0.0228  |
|                   |                   |    | Nutr+ 19h vs Nutr+ 48h | ns   | 0.7069  |
| S2d               | 1w-ANOVA<br>Tukey | 12 | -GLC 19h vs -GLC 48h   | ns   | 0.1837  |
|                   |                   |    | -GLN 19h vs -GLN 48h   | ***  | 0.0004  |
|                   |                   |    | GAL 19h vs GAL 48h     | ns   | 0.4675  |
|                   |                   |    | Nutr+ vs -GLC          | ***  | 0.0010  |
|                   |                   |    | Nutr+ vs -GLN          | **** | <0.0001 |
|                   |                   |    | -GLC vs -GLN           | **** | <0.0001 |

Suppl Figure 3

| Panel | test            | n |                       |      | p value |
|-------|-----------------|---|-----------------------|------|---------|
| S3b   | 2-tailed t-test | 6 | CTL vs LDH inhibition | **** | <0.0001 |

Suppl Figure 4

| Panel | test            | n |                                                  |   | p value |
|-------|-----------------|---|--------------------------------------------------|---|---------|
| S4    | 2-tailed t-test | 7 | T4 <sub>N</sub> -GLN vs T4 <sub>N</sub> -GLN aKG | * | 0.0119  |
|       |                 |   | T4 <sub>M</sub> -GLN vs T4 <sub>M</sub> -GLN aKG | * | 0.0466  |

Suppl Figure 5

| Panel | test            | n  |                        |      | p value |
|-------|-----------------|----|------------------------|------|---------|
| S5    | 2-tailed t-test | 12 | -GLN vs -GLN aKG       | **** | <0.0001 |
|       |                 |    | -GLN vs -GLN aKG NSide | **** | <0.0001 |

Suppl Figure 6

| Panel   | test              | n |                    |    | p value |
|---------|-------------------|---|--------------------|----|---------|
| S6a p24 | 1w-ANOVA<br>Tukey | 6 | Nutr+ vs -GLC      | ns | 0.8327  |
|         |                   |   | Nutr+ vs -GLN      | ns | 0.9177  |
|         |                   |   | Nutr+ vs -GLN a-KG | ns | 0.2397  |
|         |                   |   | Nutr+ vs -GAL      | ns | 0.1980  |
